# Supplementary material
Source: bioRxiv or medRxiv preprint supplement (https://www.biorxiv.org/highwire/filestream/36337/field_highwire_adjunct_files/0/123877-1.pdf)
Supplement: Supplementary file [file 123877-1.pdf]

# Predicting Novel Metabolic Pathways through Subgraph Mining

## Supplementary Material

Aravind Sankar  
 Dept. of CSE  
 IIT Madras  
 Chennai, India 600036  
 aravindsankar28@gmail.com

Sayan Ranu<sup>†\*</sup>  
 Dept. of CSE  
 IIT Madras  
 Chennai, India 600036  
 sayanranu@cse.iitd.ac.in

Karthik Raman<sup>†</sup>  
 Dept. of Biotechnology, Bhupat and  
 Jyoti Mehta School of Biosciences  
 IIT Madras  
 Chennai, India 600036  
 kraman@iitm.ac.in

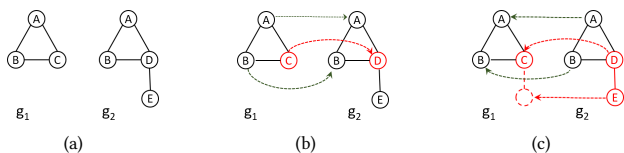

**Figure 1: Illustration of subgraph edit distance.** (a) Two sample graphs,  $g_1$  and  $g_2$ . (b) and (c) illustrate the mappings corresponding to  $sed(g_1, g_2)$  and  $sed(g_2, g_1)$ , respectively. Dashed arrows indicate the mapping between different vertices. Dashed lines denote the dummy vertices and edges. A mapping in red indicates a mapping between vertices (or edges) of unequal labels.

## A SUPPLEMENTARY METHODS

### A.1 Graph Isomorphism

**Definition A.1. GRAPH ISOMORPHISM.** Graph  $g(V, E)$  is isomorphic to  $g'(V', E')$  if there exists a bijection  $\phi$  such that for every vertex  $v \in V$ ,  $\phi(v) \in V'$  and  $l(v) = l(\phi(v))$ , and for every edge  $e = (v_1, v_2) \in E$ ,  $\phi(e) = (\phi(v_1), \phi(v_2)) \in E'$ , and  $l(e) = l(\phi(e))$ .

The concept of *subgraph isomorphism* is defined analogously by using an injection instead of a bijection. We use the notation  $s \subseteq g$  to denote the relationship that  $s$  is subgraph isomorphic to  $g$ .

### A.2 Reactant–Product Mapping

**A.2.1 Subgraph Edit Distance. Illustration of sed and RPM.** Let us consider the graphs in Fig 1a. Intuitively,  $sed(g_1, g_2)$  should be 1 since  $g_1$  can be converted to a subgraph of  $g_2$  (the triangle  $ABD$ ) by changing the label of vertex  $C$  in  $g_1$  to  $D$ . One possible mapping from  $g_1$  to  $g_2$  for  $sed(g_1, g_2)$  is shown in Fig 1b. From the definition of subgraph mapping, it is clear that the operation is asymmetric. More specifically, Fig 1c shows one possible mapping from  $g_2$  to  $g_1$  for  $sed(g_2, g_1)$ . The mapping steps are illustrated in Figs. 1b and 1c.

We now define the formal approach to compute  $sed(g, g')$  for any two graphs  $g(V, E)$  and  $g'(V', E')$ . If  $|V'| < |V|$  or  $|E'| < |E|$ , then we extend  $g'$  by *dummy vertices* or *dummy edges* such that both graphs are of equal sizes. Specifically, we create a graph  $g'^*(V'^*, E'^*)$  where  $|V| = |V'^*|$ ,  $|E| = |E'^*|$ . A dummy vertex or

edge has the label  $\epsilon$ . Adding dummy vertices and edges to  $g'$  when it is smaller than  $g$  allows us to define an injection from  $g$  to  $g'^*$  and construct a *subgraph mapping*.

To illustrate, let us revisit Fig. 1a. If we need to compute  $sed(g_1, g_2)$ , we do not need to add any dummy vertices or edges to  $g_1$  since it is smaller than  $g_2$ . On the other hand, if we are to compute  $sed(g_2, g_1)$  then dummy vertices need to be added to  $g_1$ . The dashed vertex and edge in Fig. 1c show the dummy additions for  $sed(g_2, g_1)$ .

**Definition A.2. SUBGRAPH MAPPING.** A mapping  $\phi$  between graphs  $g$  and  $g'$  is an injection  $g \rightarrow g'^*$  where  $\forall v \in V$ ,  $\phi(v) \in V'^*$  and  $\forall e = (v_1, v_2) \in E$ ,  $\phi(e) = (\phi(v_1), \phi(v_2)) \in E'^*$ .

One possible mapping from  $g_1$  to  $g_2$  is shown in Fig 1b. From the definition of subgraph mapping, it is clear that the operation is asymmetric. More specifically, Fig 1c shows one possible mapping from  $g_2$  to  $g_1$ . Since  $g_2$  contains more edges and vertices, it is necessary to add dummy vertices and edges to  $g_1$ .

**Definition A.3. SUBGRAPH EDIT DISTANCE UNDER  $\phi$ .** The distance  $sed_\phi(g, g')$  with respect to mapping  $\phi$  is as follows:

$$sed_\phi(g, g') = \sum_{v \in V} d(v, \phi(v)) + \sum_{e \in E} d(e, \phi(e)) \quad (1)$$

where  $d(v, \phi(v)) = 0$  if their labels are identical, i.e.,  $l(v) = l(\phi(v))$ . Otherwise,  $d(v, \phi(v)) = 1$ .  $d(e, \phi(e))$  is defined analogously.

Since subgraph mapping is asymmetric,  $sed_\phi(g, g')$  is asymmetric as well. For the mapping in Figure 1b,  $sed_\phi(g_1, g_2) = 1$ . On the other hand,  $sed_\phi(g_2, g_1) = 3$  (Fig 1c). The mappings between vertices and edges of unequal labels are highlighted in red. Each of these red mappings incur a cost of 1.

**Definition A.4. SUBGRAPH EDIT DISTANCE.** The *subgraph edit distance*  $sed(g, g')$  is the minimum distance under all possible mappings. Mathematically,

$$sed(g, g') = \min_{\forall \phi} \{sed_\phi(g, g')\} \quad (2)$$

$sed(g, g')$  is asymmetric. For example,  $sed(g_1, g_2) = 1$  since the mapping in Example 1b minimises the distance. Similarly,  $sed(g_2, g_1) = 3$ .

Algorithm 1 presents the pseudocode to perform RPM using *sed*. The algorithm proceeds in a greedy manner: first, we identify the pair in a reaction  $\mathcal{R}$  that minimises the following function (line 4).

<sup>†</sup>Present address: Department of Computer Science and Engineering, IIT Delhi, New Delhi - 110016, India

<sup>†</sup>Corresponding author.

```

1:  $matchedPairs \leftarrow \emptyset$ 
2: Discard simple molecules from  $PS(\mathcal{R})$ 
3: while  $PS(\mathcal{R}) \neq \emptyset$  do
4:    $(A, B) \leftarrow \min_{A \in RS(\mathcal{R}), B \in PS(\mathcal{R})} \{min\{sed(A, B), sed(B, A)\}\}$ 

5:    $matchedPairs \leftarrow matchedPairs \cup (A, B)$ 
6:    $PS(\mathcal{R}) \leftarrow PS(\mathcal{R}) - B$ 
7: return  $matchedPairs$ 

```

**Algorithm 1:**  $RPM(\mathcal{R})$ . The algorithm for computing RPM for a given reaction,  $\mathcal{R}$ .

$$(A, B) = \min_{A \in RS(\mathcal{R}), B \in PS(\mathcal{R})} \{min\{sed(A, B), sed(B, A)\}\} \quad (3)$$

More simply, we choose the pair that matches best. Since  $sed(g, g')$  is asymmetric, we explore mapping in both directions and choose the one that minimises the distance. In case of a tie, we choose the pair that is closer in size. We assign the  $(A, B)$  pair as matched (line 5) and then retrieve the next best pair containing an unmatched product (line 6). We continue this iteration till all products are matched (line 3). Notice that RPM may not necessarily be one-to-one. In a decomposition reaction  $AB \rightarrow A + B$ , we would have one-to-many mappings of  $RPM(AB, A)$  and  $RPM(AB, B)$ . Similarly, many-to-one mappings are possible when two reactants combine to form a single product. For practical purposes, we do not match molecules such as water, oxygen, ammonia, etc. even if they appear as products since they cannot be used as primary reactants in a pathway (line 2). The complete list of unmatched metabolites is given in S1 Table.

Note that Algorithm 1 iterates till all products are matched and hence it is possible for some reactants to remain unmatched. This does not hurt our ultimate goal of predicting pathways. Any target molecule that we want to synthesize would be a product of some reaction. Thus, we only need to store structural changes corresponding to products.

Revisiting Fig 1a (main manuscript), it is easy to see that ethanal and propanal would get mapped to ethanol and propanol. A slightly more complex reaction is shown in Fig 3a (main manuscript). We refer to each molecule by their KEGG compound IDs (CIDs) shown in the image. There are three products in this reaction, out of which Ammonia (C00014) is discarded. Among the remaining two, C00002 matches equally well with C00020 and C00013, with a distance of 1. However, since it is closer in size to C00020, we pick the pair (C00020, C00002). C00049 matches best with C00152 with a distance of 1. Thus, the pair (C00049, C00152) is added and the RPM process completes, since there are no more products left to match.

| Reactant | Product | sed | Reactant | Product | sed |
|----------|---------|-----|----------|---------|-----|
| C00020   | C00002  | 1   | C00152   | C00049  | 1   |
| C00013   | C00002  | 1   | C00013   | C00049  | >1  |
| C00152   | C00002  | >1  | C00020   | C00049  | >1  |

### A.3 Reaction Centres

The reaction centre for a pair  $(A, B)$  is the set of vertices in the product  $B$  to which new edges are added or existing edges are removed

during its transformation from  $A$ . The reaction centre can easily be determined from the mapping  $\phi$  corresponding to  $sed(A, B)$ . Specifically, it is a vertex  $v$  in the product  $B$ , such that  $l(v) = l(\phi(v))$ , but there exists an edge  $(v, v')$ , where  $l(v') \neq l(\phi(v'))$ . Recall,  $l(v)$  denotes the label of  $v$ .

### A.4 Computing Reaction Signatures

The reaction signatures involve computations of added and removed subgraphs, as we explain below.

**A.4.1 Addition of subgraph.** This contains the subgraph that got added to the product during the reaction. For example, in the (C00152, C00049) pair,  $OH$  gets added to C00049.

Formally, this added subgraph  $D$  can be computed using the mapping function  $\phi$ . A vertex  $v \in V_B$  is also in the added subgraph  $D(V_D, E_D)$  if it satisfies one of the following conditions:

- (1) If  $\phi$  is from  $A$  to  $B$ , either  $\nexists v' \in V_A$ , such that  $\phi(v') = v$ , or  $\exists v' \in V_A$ , such that  $\phi(v') = v$  and  $l(\phi(v')) \neq l(v)$
- (2) If  $\phi$  is from  $B$  to  $A$ , either  $\nexists v' \in V_A$ , such that  $\phi(v) = v'$ , or  $\exists v' \in V_A$ , such that  $\phi(v) = v'$  and  $l(\phi(v)) \neq l(v')$
- (3)  $v \in V_c$ ,  $V_c$  is the set of reaction centres

We include the reaction centres in this subgraph since it will contain at least one connecting edge that got added. The edge set  $E_D = \{e = (v_1, v_2) \in E_B \mid v_1, v_2 \in V_D\}$ .

**A.4.2 Removal of subgraph.** This information encodes all subgraphs that got removed from the reactant. For example, in C00152,  $NH_2$  gets removed. We compare the structures of the product and the reactant using the mapping  $\phi$  and compute the subgraph  $R(V_R, E_R)$  that was removed. A vertex  $v \in V_A$  is also in  $V_R$  if it satisfies one of the following conditions:

- (1) If  $\phi$  is from  $A$  to  $B$ , either  $\nexists v' \in V_B$ , such that  $\phi(v) = v'$ , or  $\exists v' \in V_B$ , such that  $\phi(v) = v'$  and  $l(\phi(v)) \neq l(v')$
- (2) If  $\phi$  is from  $B$  to  $A$ , either  $\nexists v' \in V_A$ , such that  $\phi(v') = v$ , or  $\exists v' \in V_A$ , such that  $\phi(v') = v$  and  $l(\phi(v')) \neq l(v)$
- (3)  $v \in V_c$ ,  $V_c$  is the set of reaction centres

The edge set  $E_R = \{e = (v_1, v_2) \in E_A \mid v_1, v_2 \in V_R\}$ .

### A.5 Extending the KEGG Dataset

We expanded an initial seed set of 10,065 known KEGG biochemical reactions to form a synthetic set of 150,000 reactions, to examine the scalability of our approach. We first extract the reaction product pairs from our basic dataset. In a given pair, we randomly replace one or more hydrogen atoms with different functional groups to create multiple new pairs. We aggregate all these pairs to obtain our expanded synthetic compound and reaction databases. The reaction rules are finally mined on this synthetic dataset. The final reaction database contained a total of 188,604 unique molecules.

### A.6 Metabolites unmatched in RPM

Table S1 provides a list of inorganic metabolites unmatched in RPM. These are small metabolites that routinely occur in reactions but are not important in the context of the *main backbone transformation* happening in a biosynthetic pathway.

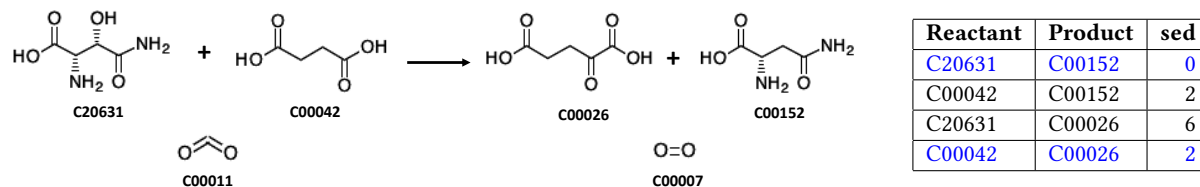

Figure 2: Another example reaction to illustrate RPM using subgraph edit distance. The final matched pairs are highlighted blue.

S1 Table. A list of metabolites unmatched in RPM. The table provides a list of (mostly) inorganic metabolites unmatched in RPM. These are small metabolites that routinely occur in reactions but are not important in the context of the *main backbone transformation* happening in a biosynthetic pathway.

| KEGG CID | Metabolite Name |
|----------|-----------------|
| C00001   | $H_2O$          |
| C00007   | Oxygen          |
| C00009   | Orthophosphate  |
| C00010   | CoA             |
| C00011   | $CO_2$          |
| C00013   | Diphosphate     |
| C00014   | Ammonia         |
| C00027   | $H_2O_2$        |
| C00080   | $H^+$           |
| C00237   | CO              |
| C01327   | HCl             |

## A.7 Pre-processing of MOL files

Each .mol file in the compound database was processed using OpenBabel [1] to obtain the graph structure. As explained earlier, the atoms and bonds constitute the vertices and edges respectively and the edge labels are defined using the bond order and stereochemistry information available.

## A.8 Details on the different pathways used

We consider shorter sub-pathways in cases the original pathway is long, such as glycolysis. The RPM identified by our algorithm is indicated by underlining the matching metabolites.

**S2 Table. Details on the different pathways used. We consider shorter sub-pathways in cases the original pathway is long, such as glycolysis. The RPM identified by our algorithm is indicated by underlining the matching metabolites.**

---

|                                                                                               |                                                    |
|-----------------------------------------------------------------------------------------------|----------------------------------------------------|
| <b>Pathway 1: Glycolysis sub-pathway 1, <math>\alpha</math>-D-Glucose to D-Glyceraldehyde</b> |                                                    |
| C00267 → C00668 → C05345 → C05378 → C00118                                                    |                                                    |
| <b>R01786</b>                                                                                 | C00002 + <u>C00267</u> ⇌ C00008 + <u>C00668</u> or |
| or <b>R02189</b>                                                                              | C00404 + <u>C00267</u> ⇌ C00404 + <u>C00668</u> or |
| or <b>R09085</b>                                                                              | <u>C00267</u> + C00008 ⇌ <u>C00668</u> + C00020    |
| <b>R02740</b>                                                                                 | <u>C00668</u> ⇌ <u>C05345</u>                      |
| <b>R04779</b>                                                                                 | C00002 + <u>C05345</u> ⇌ C00008 + <u>C05378</u> or |
| or <b>R09084</b>                                                                              | <u>C05345</u> + C00008 ⇌ <u>C05378</u> + C00020    |
| <b>R01070</b>                                                                                 | <u>C05378</u> ⇌ C00111 + <u>C00118</u>             |

---

|                                                                          |                                                                         |
|--------------------------------------------------------------------------|-------------------------------------------------------------------------|
| <b>Pathway 2: Glycolysis sub-pathway 2, D-Glyceraldehyde to Pyruvate</b> |                                                                         |
| C00118 → C00197 → C00631 → C00074 → C00022                               |                                                                         |
| <b>R07159</b>                                                            | <u>C00118</u> + C00001 + 2 C00139 ⇌ <u>C00197</u> + 2 C00080 + 2 C00138 |
| <b>R01518</b>                                                            | <u>C00197</u> ⇌ <u>C00631</u>                                           |
| <b>R00658</b>                                                            | <u>C00631</u> ⇌ <u>C00074</u> + C00001                                  |
| <b>R00200</b>                                                            | C00008 + <u>C00074</u> ⇌ C00002 + <u>C00022</u>                         |

---

|                                                                                                      |                                                                         |
|------------------------------------------------------------------------------------------------------|-------------------------------------------------------------------------|
| <b>Pathway 3: L-Histidine Biosynthesis full pathway, from 5-Phospho-<math>\alpha</math>-D-ribose</b> |                                                                         |
| C00119 → C02739 → C02741 → C04896 → C04916 → C04666 → C01267 → C01100 → C00860 → C00135              |                                                                         |
| <b>R01071</b>                                                                                        | C00002 + <u>C00119</u> ⇌ <u>C02739</u> + C00013                         |
| <b>R04035</b>                                                                                        | <u>C02739</u> + C00001 ⇌ <u>C02741</u> + C00013                         |
| <b>R04037</b>                                                                                        | <u>C02741</u> + C00001 ⇌ <u>C04896</u>                                  |
| <b>R04640</b>                                                                                        | <u>C04896</u> ⇌ <u>C04916</u>                                           |
| <b>R04558</b>                                                                                        | <u>C04916</u> + C00064 ⇌ <u>C04666</u> + C04677 + C00025                |
| <b>R03457</b>                                                                                        | <u>C04666</u> ⇌ <u>C01267</u> + C00001                                  |
| <b>R03243</b>                                                                                        | <u>C01267</u> + C00025 ⇌ <u>C01100</u> + C00026                         |
| <b>R03013</b>                                                                                        | <u>C01100</u> + C00001 ⇌ <u>C00860</u> + C00009                         |
| <b>R01158</b>                                                                                        | <u>C00860</u> + 2 C00003 + C00001 ⇌ <u>C00135</u> + 2 C00004 + 2 C00080 |

---

|                                                          |                                                                         |
|----------------------------------------------------------|-------------------------------------------------------------------------|
| <b>Pathway 4: L-Histidine Biosynthesis sub-pathway 1</b> |                                                                         |
| C04916 → C04666 → C01267 → C01100 → C00860 → C00135      |                                                                         |
| <b>R04558</b>                                            | <u>C04916</u> + C00064 ⇌ <u>C04666</u> + C04677 + C00025                |
| <b>R03457</b>                                            | <u>C04666</u> ⇌ <u>C01267</u> + C00001                                  |
| <b>R03243</b>                                            | <u>C01267</u> + C00025 ⇌ <u>C01100</u> + C00026                         |
| <b>R03013</b>                                            | <u>C01100</u> + C00001 ⇌ <u>C00860</u> + C00009                         |
| <b>R01158</b>                                            | <u>C00860</u> + 2 C00003 + C00001 ⇌ <u>C00135</u> + 2 C00004 + 2 C00080 |

---

|                                                           |                                                          |
|-----------------------------------------------------------|----------------------------------------------------------|
| <b>Pathway 5: D-Galacturonate degradation to Pyruvate</b> |                                                          |
| C00333 → C00558 → C00817 → C00204 → C04442 → C00022       |                                                          |
| <b>R01983</b>                                             | <u>C00333</u> ⇌ <u>C00558</u>                            |
| <b>R02555</b>                                             | <u>C00558</u> + C00004 + C00080 ⇌ <u>C00817</u> + C00003 |
| <b>R01540</b>                                             | <u>C00817</u> ⇌ <u>C00204</u> + C00001                   |
| <b>R01541</b>                                             | C00002 + <u>C00204</u> ⇌ C00008 + <u>C04442</u>          |
| <b>R05605</b>                                             | <u>C04442</u> ⇌ <u>C00022</u> + C00118                   |

---

(S2 Table contd.) Details on the different pathways used.

---

**Pathway 6: Pyridoxal biosynthesis, D-Erythrose to Pyridoxal phosphate**

C00279 → C03393 → C06054 → C06055 → C07335 → C11638 → C00627 → C00018

**R01825**     C00279 + C00003 + C00001 ⇌ C03393 + C00004 + C00080

**R04210**     C03393 + C00003 ⇌ C06054 + C00004 + C00080

**R05085**     C06054 + C00025 ⇌ C06055 + C00026

**R05681**     C06055 + C00003 ⇌ C07335 + C00004 + C00080

**R07406**     C07335 ⇌ C11638 + C00011

**R05838**     C11638 + C11437 ⇌ C00627 + C00009 + 2 C00001

**R00278**     C00627 + C00007 ⇌ C00027 + C00018

---

**Pathway 7: L-Threonine to L-Isoleucine**

C00188 → C00109 → C06006 → C14463 → C06007 → C00671 → C00407

**R00996**     C00188 ⇌ C00109 + C00014

**R08648**     C00022 + C00109 ⇌ C06006 + C00011

**R05069**     C06006 ⇌ C14463

**R05068**     C14463 + C00005 + C00080 ⇌ C06007 + C00006

**R05070**     C06007 ⇌ C00671 + C00001

**R02199**     C00671 + C00025 ⇌ C00407 + C00026

---

**Pathway 8: Tetrahydrofolate biosynthesis sub-pathway 1, GTP to 7,8-dihydropteridine**

C00044 → C05922 → C05923 → C06148 → C04895 → C04874

**R00428**     C00044 + C00001 ⇌ C05922

**R05046**     C05922 + C00001 ⇌ C05923 + C00058

**R05048**     C05923 ⇌ C06148

**R04639**     C06148 ⇌ C04895 + C00001

**R04620**     C04895 + 3 C00001 ⇌ C04874 + 3 C00009

---

**Pathway 9: Tetrahydrofolate biosynthesis sub-pathway 2, 7,8-Dihydroneopterin triphosphate to Dihydrofolate**

C04895 → C04874 → C01300 → C04807 → C00921 → C00415

**R04620**     C04895 + 3 C00001 ⇌ C04874 + 3 C00009

**R03504**     C04874 ⇌ C00266 + C01300

**R03503**     C00002 + C01300 ⇌ C00020 + C04807

**R03067**     C04807 + C00568 ⇌ C00013 + C00921

**R02237**     C00002 + C00921 + C00025 ⇌ C00008 + C00009 + C00415

---

**Pathway 10: L-Aspartate to 2,3,4,5-Tetrahydrodipicolinate, part of Lysine biosynthesis**

C00049 → C03082 → C00441 → C20258 → C03972

**R00480**     C00002 + C00049 ⇌ C00008 + C03082

**R02291**     C03082 + C00005 + C00080 ⇌ C00441 + C00009 + C00006

**R10147**     C00441 + C00022 ⇌ C20258 + C00001

**R04198**     C20258 + C00004 + C00080 ⇌ C03972 + C00003 + C00001

or **R04199**     C20258 + C00005 + C00080 ⇌ C03972 + C00006 + C00001

---

(S2 Table contd.) Details on the different pathways used.

---

**Pathway 11: Threonine biosynthesis, L-Aspartate to L-Threonine**

C00049 → C03082 → C00441 → C00263 → C01102 → C00188

**R00480** C00002 + C00049 ⇌ C00008 + C03082  
**R02291** C03082 + C00005 + C00080 ⇌ C00441 + C00009 + C00006  
**R01773** C00441 + C00004 + C00080 ⇌ C00263 + C00003  
or **R01775** C00441 + C00005 + C00080 ⇌ C00263 + C00006  
**R01771** C00002 + C00263 ⇌ C00008 + C01102  
**R01466** C01102 + C00001 ⇌ C00188 + C00009

---

**Pathway 12: Oxaloacetate to L-Glutamate**

C00036 → C00158 → C00311 → C00026 → C00025

**R00351** C00024 + C00001 + C00036 ⇌ C00158 + C00010  
**R01324** C00158 ⇌ C00311  
**R00267** C00311 + C00006 ⇌ C00026 + C00011 + C00005 + C00080  
**R00355** C00049 + C00026 ⇌ C00036 + C00025

---

**Pathway 13: Entner-Doudoroff pathway, β-D-Glucose to D-Glyceraldehyde**

C01172 → C01236 → C00345 → C04442 → C00118

**R02736** C01172 + C00006 ⇌ C01236 + C00005 + C00080  
**R02035** C01236 + C00001 ⇌ C00345  
**R02036** C00345 ⇌ C04442 + C00001  
**R05605** C04442 ⇌ C00118 + C00022

---

**Pathway 14: 2-Oxobutanoate to L-Isoleucine**

C00109 → C06006 → C14463 → C06007 → C00671 → C00407

**R08648** C00022 + C00109 ⇌ C06006 + C00011  
**R05069** C06006 ⇌ C14463  
**R05068** C14463 + C00005 + C00080 ⇌ C06007 + C00006  
**R05070** C06007 ⇌ C00671 + C00001  
**R02199** C00671 + C00025 ⇌ C00407 + C00026

---

**Pathway 15: Chorismate to L-Tryptophan**

C00251 → C00108 → C04302 → C01302 → C03506 → C00078

**R00985** C00251 + C00014 ⇌ C00108 + C00022 + C00001  
or **R00986** C00251 + C00064 ⇌ C00108 + C00022 + C00025  
**R01073** C00108 + C00119 ⇌ C04302 + C00013  
**R03509** C04302 ⇌ C01302  
**R03508** C01302 ⇌ C03506 + C00011 + C00001  
**R02722** C00065 + C03506 ⇌ C00078 + C00118 + C00001

---

**Pathway 16: Shikimate to L-Tyrosine**

C00493 → C03175 → C01269 → C00251 → C00254 → C01179 → C00082

**R02412** C00002 + C00493 ⇌ C00008 + C03175  
**R03460** C00074 + C03175 ⇌ C00009 + C01269  
**R01714** C01269 ⇌ C00251 + C00009  
**R01715** C00251 ⇌ C00254  
**R01728** C00254 + C00003 ⇌ C01179 + C00011 + C00004 + C00080  
**R00734** C01179 + C00025 ⇌ C00082 + C00026

---

(S2 Table contd.) Details on the different pathways used.

---

**Pathway 17: Ornithine biosynthesis, L-Glutamate ⇒ L-Ornithine**

C00025 → C00624 → C04133 → C01250 → C00437 → C00077

**R00259** C00024 + C00025 ⇌ C00010 + C00624

**R02649** C00002 + C00624 ⇌ C00008 + C04133

**R03443** C04133 + C00005 + C00080 ⇌ C01250 + C00009 + C00006

**R02283** C01250 + C00025 ⇌ C00437 + C00026

**R00669** C00437 + C00001 ⇌ C00033 + C00077

or **R02282** C00437 + C00025 ⇌ C00077 + C00624

---

**Pathway 18: Phosphoenolpyruvate to L-Aspartate**

C00074 → C00022 → C00041 → C00049

**R00200** C00008 + C00074 ⇌ C00002 + C00022

**R00258** C00022 + C00025 ⇌ C00041 + C00026

**R00397** C00041 + C00011 ⇌ C00049

---

**Pathway 19: Phosphoenolpyruvate to L-Asparagine**

C00074 → C00022 → C00041 → C00049 → C00152

**R00200** C00008 + C00074 ⇌ C00002 + C00022

**R00258** C00022 + C00025 ⇌ C00041 + C00026

**R00397** C00041 + C00011 ⇌ C00049

**R00483** C00002 + C00049 + C00014 ⇌ C00020 + C00013 + C00152

---

**Pathway 20: L-Glutamate to L-Proline**

C00025 → C03287 → C01165 → C03912 → C00148

**R00239** C00002 + C00025 ⇌ C00008 + C03287

**R03313** C03287 + C00005 + C00080 ⇌ C01165 + C00009 + C00006

**R03314** C01165 ⇌ C03912 + C00001

**R01251** C03912 + C00005 + C00080 ⇌ C00148 + C00006

---

**REFERENCES**

- [1] Noel M. O'Boyle, Michael Banck, Craig A. James, Chris Morley, Tim Vandermeersch, and Geoffrey R. Hutchison. 2011. Open Babel: An open chemical toolbox. *Journal of Cheminformatics* 3, 1 (2011), 33–14. DOI: <https://doi.org/10.1186/1758-2946-3-33>
